# Supplementary material for: Survival after checkpoint inhibitors for metastatic acral, mucosal and uveal melanoma
Source: PubMed Central journal article supplement — J Immunother Cancer. 2020 Mar 24;8(1):e000341. doi: 10.1136/jitc-2019-000341 (PMC7103823; doi:10.1136/jitc-2019-000341), 2020-03-24
Supplement: jitc-2019-000341supp001.pdf [file jitc-2019-000341supp001.pdf]

| <u>Series</u>      | <u>Histology</u> | <u>Patients</u> | <u>Target</u>                 | <u>Median OS</u>   | <u>2 year OS (%)</u> |
|--------------------|------------------|-----------------|-------------------------------|--------------------|----------------------|
| Johnson 2015       | Acral            | 35              | CTLA-4                        | 16.7 months        | 28%                  |
| Shoushtari 2016    | Acral            | 25              | PD-1                          | 31.7 months        | 65%                  |
| <b>Klemen 2019</b> | <b>Acral</b>     | <b>22</b>       | <b>CTLA-4<br/>and/or PD-1</b> | <b>17.4 months</b> | <b>45%</b>           |
| Postow 2013        | Mucosal          | 33              | CTLA-4                        | 6.4 months         | 18%                  |
| Shoushtari 2016    | Mucosal          | 35              | PD-1                          | 12.4 months        | Not shown            |
| <b>Klemen 2019</b> | <b>Mucosal</b>   | <b>38</b>       | <b>CTLA-4<br/>and/or PD-1</b> | <b>17.7 months</b> | <b>39%</b>           |
| Luke 2013          | Uveal            | 39              | CTLA-4                        | 9.6 months         | 22%                  |
| Zimmer 2015        | Uveal            | 53              | CTLA-4                        | 6.8 months         | 7%                   |
| Algazi 2016        | Uveal            | 56              | PD-1 or PD-L1                 | 7.6 months*        | 27%*                 |
| <b>Klemen 2019</b> | <b>Uveal</b>     | <b>30</b>       | <b>CTLA-4<br/>and/or PD-1</b> | <b>12.2 months</b> | <b>37%</b>           |
